# Supplementary material
Source: publisher figshare collection journal article supplement (https://acs.figshare.com/ndownloader/files/4241191)
Supplement: Supplementary file 1 [file 4241191]

## **Supporting Information**

### **Resistance of galactoside-terminated alkanethiol self-assembled monolayers to marine fouling organisms**

Thomas Ederth\*, Tobias Ekblad, Michala E. Pettitt, Sheelagh L. Conlan, Chun-Xia Du,  
Maureen E. Callow, James A. Callow, Robert Mutton, Anthony S. Clare, Fraddry  
D'Souza, Glen Donnelly, Anouk Bruin, Peter R. Willemsen, Xueju J. Su, Su Wang, Qi  
Zhao, Markus Hederos, Peter Konradsson, Bo Liedberg

\* e-mail: ted@ifm.liu.se

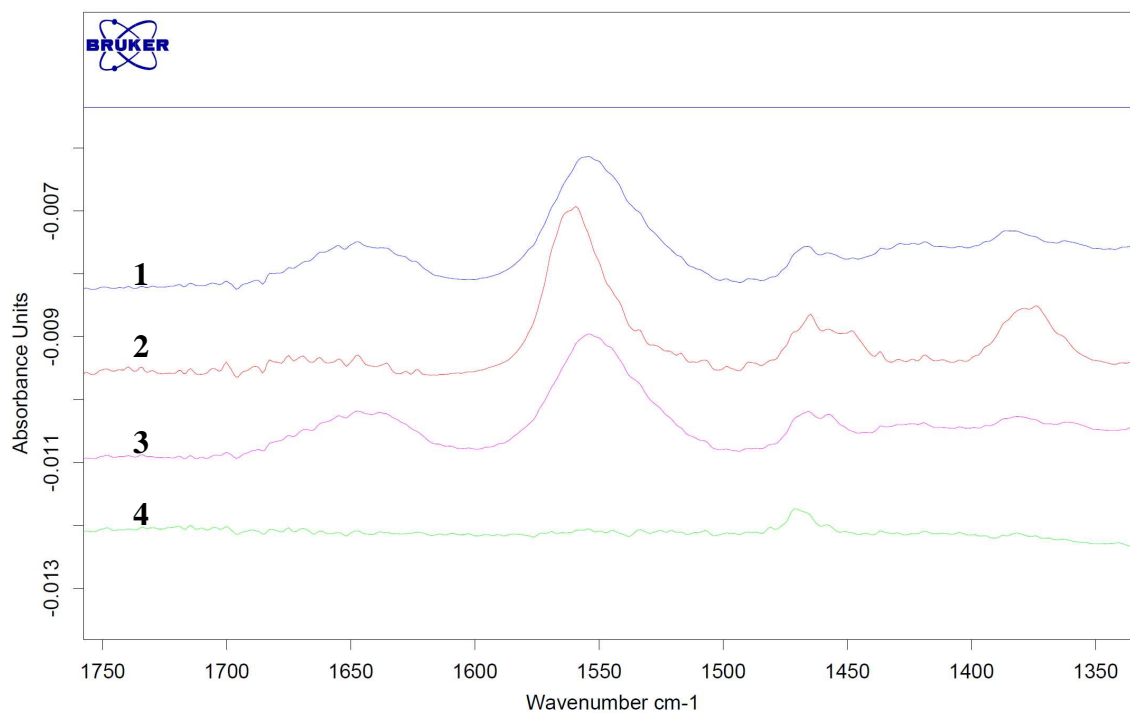

**Figure S1. IRAS data for the Amide region of the spectrum.**

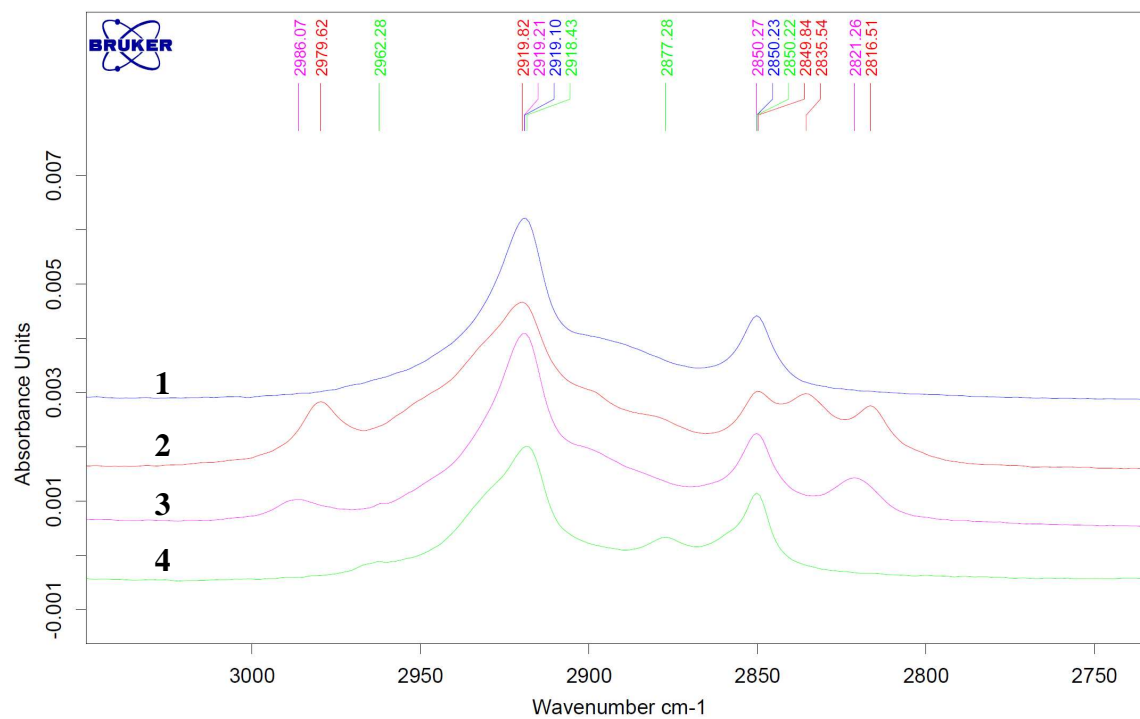

**Figure S2. IRAS data for the C-H-stretch region of the spectrum.**

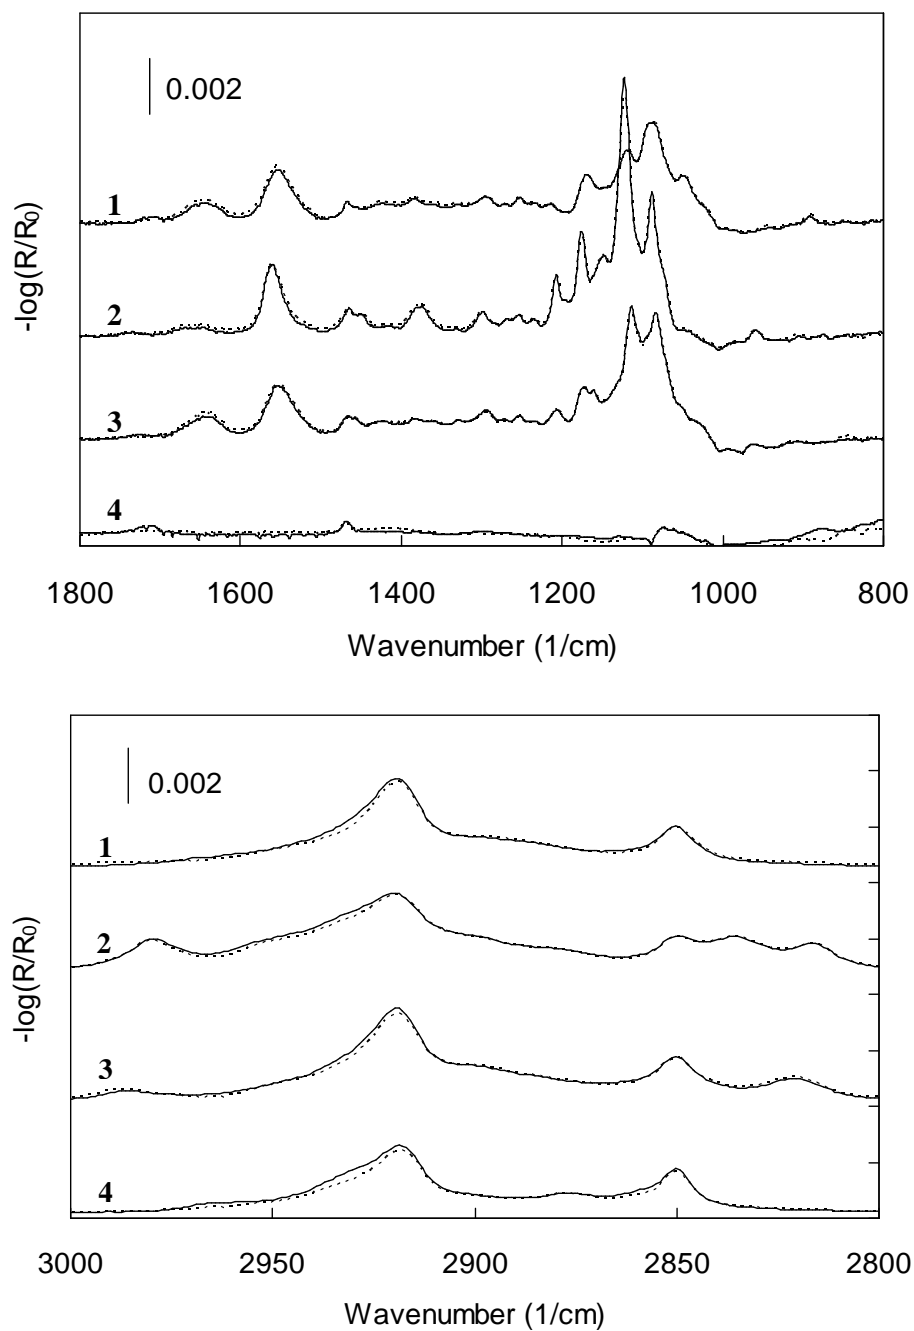

**Figure S3.** IRAS data for SAMs 1-4 in the Amide and fingerprint regions (upper panel) and C—H stretch region (lower panel). Solid and dashed lines represent the spectrum before and after 60 h immersion in filtered artificial seawater (ASW), respectively. A linear baseline correction and water spectrum subtraction were applied to all spectra. Differences in wettability as measured before and after immersion of the samples in ASW were  $< 3^\circ$  for all SAMs, and differences in ellipsometric thickness were  $< 0.6 \text{ \AA}$ .

Formation

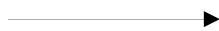

After flow cell

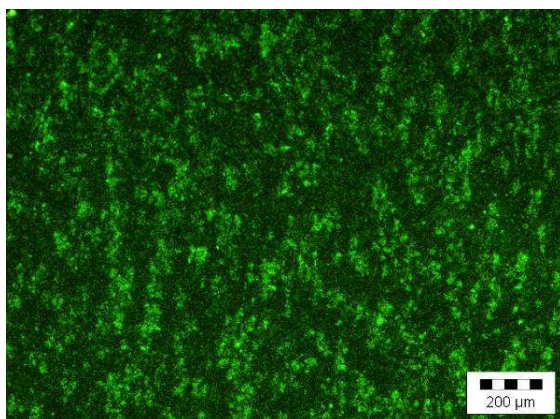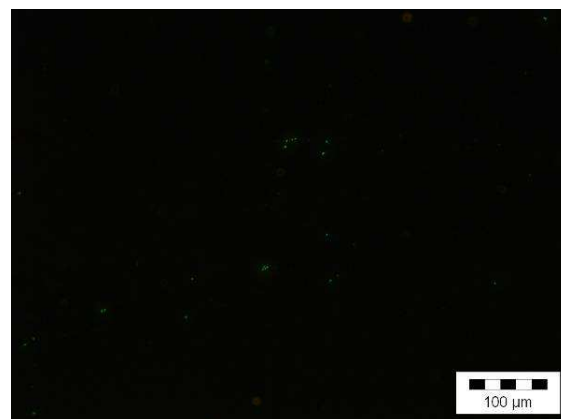

1 Hydroxylated galactoside

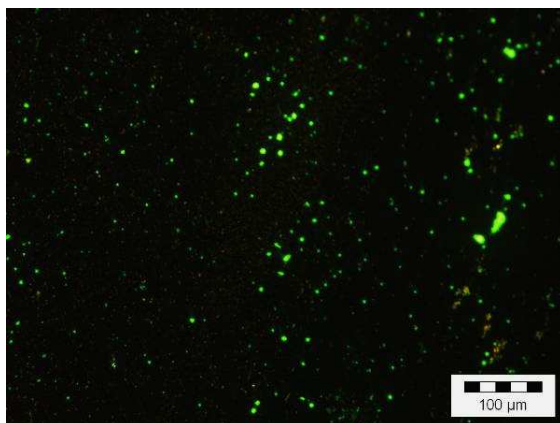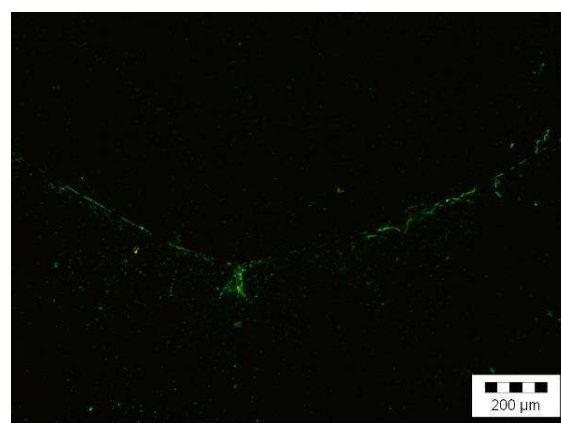

2 Methylated galactoside

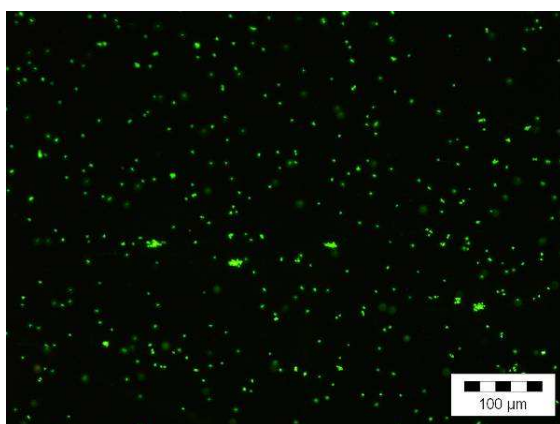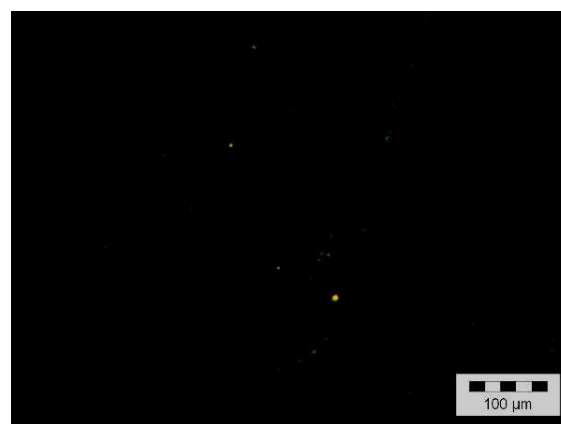

3 Monomethylated galactoside

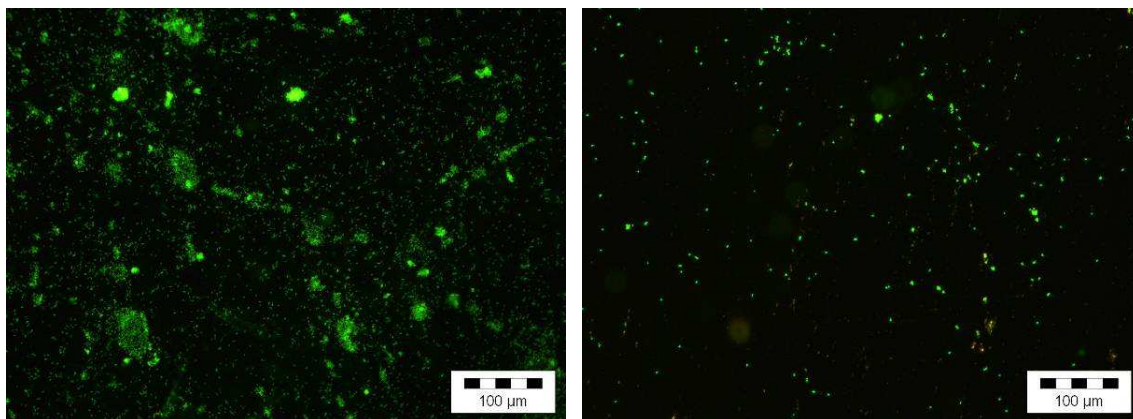

4 CH<sub>3</sub>-/OH-terminated alkylthiols

**Figure S4:** Fluorescence microscopy images illustrating the attachment of *Marinobacter hydrocarbonoclasticus* before and after exposure to the flow cell.

Formation

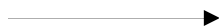

After flow cell

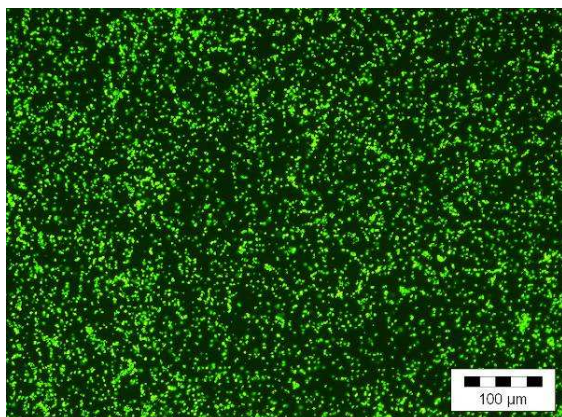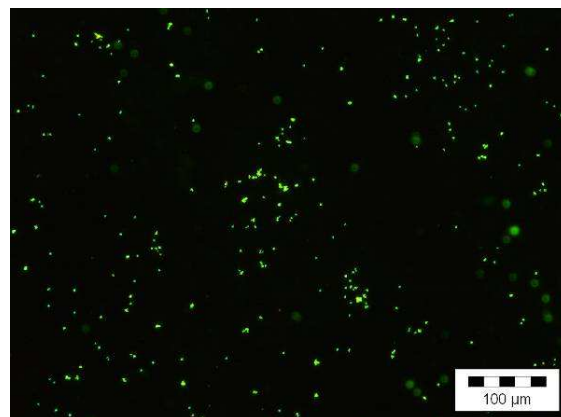

**1** Hydroxylated galactoside

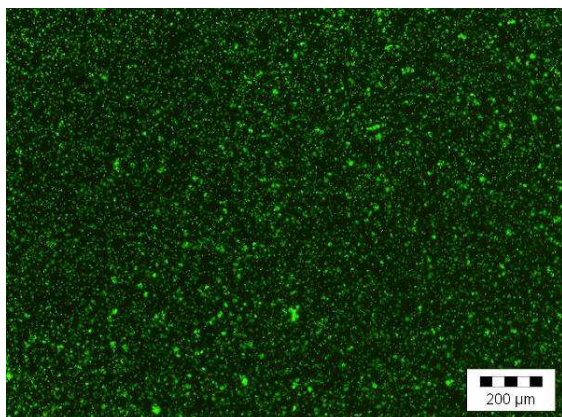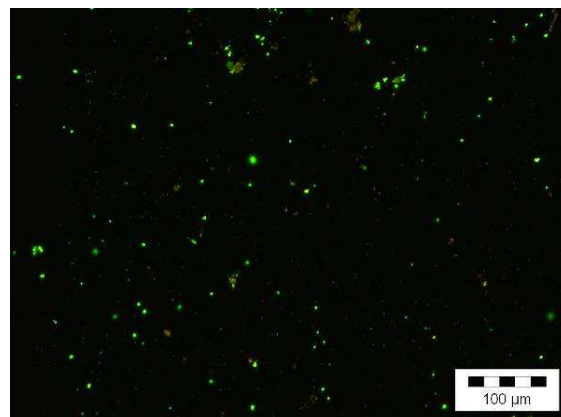

**2** Methylated galactoside

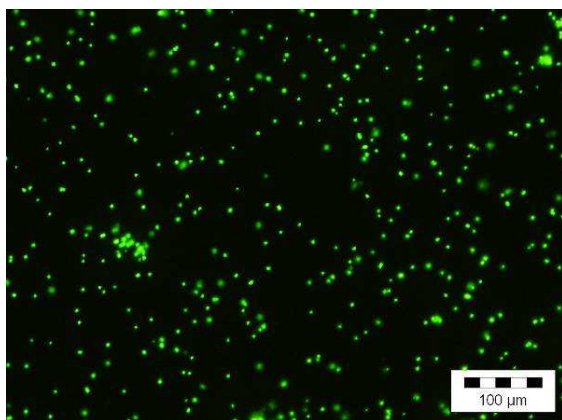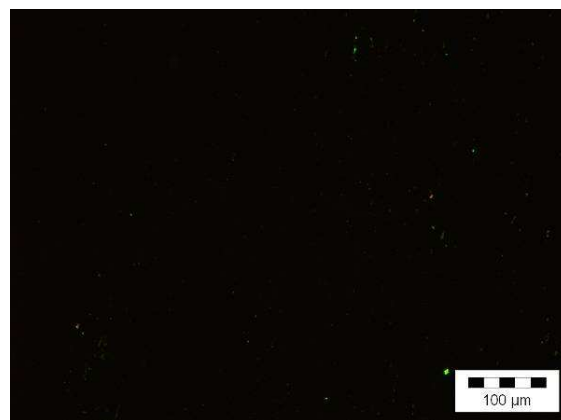

**3** Monomethylated galactoside



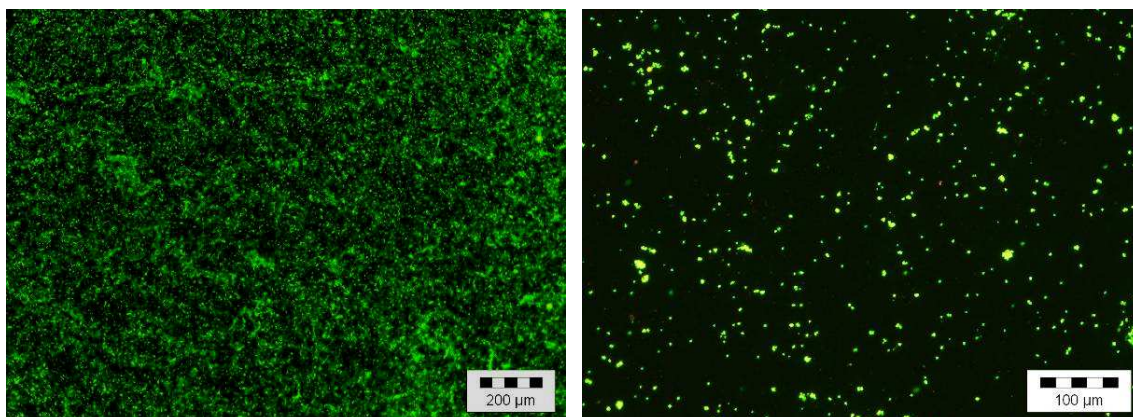

4 CH<sub>3</sub>-/OH-terminated alkylthiols

**Figure S5: Fluorescence microscopy images illustrating the attachment of *Cobetia marina* before and after exposure to the flow cell.**

## The Good - van Oss - Chaudhury model [1]

The surface free energy is divided into a Lifshitz-van der Waals (dispersive) component  $\gamma^{LW}$  and a Lewis acid-base (polar) component  $\gamma^{AB}$ . The polar component is further split into a Lewis base (electron donor) component  $\gamma^-$  and a Lewis acid (electron acceptor) component  $\gamma^+$ , so that

$$\gamma = \gamma^{LW} + \gamma^{AB} = \gamma^{LW} + 2\sqrt{\gamma^- \gamma^+}$$

For a liquid  $i$ , the model provides a relation between the contact angle  $\theta$  and the contributions to the surface free energy (subscript  $s$  indicate the solid,  $li$  is liquid  $i$ ):

$$\gamma_{li}(\cos \theta_{li} + 1) = 2 \left[ \sqrt{\gamma_s^{LW} \gamma_{li}^{LW}} + \sqrt{\gamma_s^+ \gamma_{li}^-} + \sqrt{\gamma_s^- \gamma_{li}^+} \right]$$

If the surface energy components of the liquid are known, and the contact angle is measured, this equation has three unknown variables;  $\gamma_s^{LW}$ ,  $\gamma_s^+$  and  $\gamma_s^-$ . If we choose three different liquids we could solve the system of equations formed from the equation above with each liquid. For convenience, the relation above could be rewritten to

$$\sqrt{\gamma_s^{LW}} \sqrt{\gamma_{li}^{LW}} + \sqrt{\gamma_s^+} \sqrt{\gamma_{li}^-} + \sqrt{\gamma_s^-} \sqrt{\gamma_{li}^+} = \frac{\gamma_{li}}{2} (\cos \theta_{li} + 1)$$

If we take liquid 3 ( $l3$ ) to be a non-polar liquid (for which  $\gamma_{l3}^{AB} = \gamma_{l3}^+ = \gamma_{l3}^- = 0$ , we obtain  $\gamma_s^{LW}$  directly from

$$\gamma_s^{LW} = \gamma_{l3}^{LW} \frac{(\cos \theta_{l3} + 1)^2}{4}$$

and we can use the thus calculated value of  $\gamma_s^{LW}$  to write a  $2 \times 2$  equation system

$$\begin{pmatrix} \sqrt{\gamma_{l1}^-} & \sqrt{\gamma_{l1}^+} \\ \sqrt{\gamma_{l2}^-} & \sqrt{\gamma_{l2}^+} \end{pmatrix} \begin{pmatrix} \sqrt{\gamma_s^+} \\ \sqrt{\gamma_s^-} \end{pmatrix} = \begin{pmatrix} \frac{\gamma_{l1}}{2} (\cos \theta_{l1} + 1) - \sqrt{\gamma_s^{LW}} \sqrt{\gamma_{l1}^{LW}} \\ \frac{\gamma_{l2}}{2} (\cos \theta_{l2} + 1) - \sqrt{\gamma_s^{LW}} \sqrt{\gamma_{l2}^{LW}} \end{pmatrix}$$

Having measured the contact angles, all parameters on the right side are known now, so we can solve this for  $\sqrt{\gamma_s^+}$  and  $\sqrt{\gamma_s^-}$ .

For the free energy calculations we have used the following data from [1].

|                 | $\gamma$ | $\gamma^{LW}$ | $\gamma^{AB}$ | $\gamma^+$ | $\gamma^-$ |
|-----------------|----------|---------------|---------------|------------|------------|
| Water           | 72.8     | 21.8          | 51            | 25.5       | 25.5       |
| Ethylene glycol | 48       | 29            | 19            | 1.92       | 47         |
| Diiodomethane   | 50.8     | 50.8          | 0             | 0          | 0          |

[1] R.J. Good, *Contact angle, wetting and adhesion: A critical review*, in *Contact angle, wettability and adhesion*, K.L. Mittal (Ed.), VSP: Utrecht **1993**.
